# Supplementary material for: Longitudinal changes in skeletal muscle and adipose tissue during surgical treatment of oesophagogastric cancer: a prospective study.
Source: Research Square preprint supplement (doi:10.21203/rs.3.rs-4704469/v1), 2024-10-08
Supplement: Supplementary file 1 [file 86df966aef7a5c838ce948d6.docx]

**Table 2:** Body mass index (BMI) and weight loss from diagnosis to 12 months postoperatively. Percentage weight loss was recorded as total weight lost from premorbid weight**.**

|  | Diagnosis  n = 45 | Preoperative  n = 50 | Week 2  n = 42 | Week 6  n = 36 | Week 12  n = 37 | 6 months  n = 36 | 12 months  n = 36 | P value |
| --- | --- | --- | --- | --- | --- | --- | --- | --- |
| BMI (kg/m2) mean (SE) | 29.0 (1.1) | 27.9 (1.1) | 26.0 (1.1) | 25.3 (1.1) | 24.9 (1.1) | 24.4 (1.1) | 24.5 (1.1) | < 0.001* |
| *BMI categories n (%)* |  |  |  |  |  |  |  |  |
| Underweight (≤ 18.5 kg/m2) | 5 (11) | 4 (8) | 8 (19) | 11 (31) | 10 (27) | 13 (36) | 9 (25) |  |
| Healthy weight (18.5-24.9 kg/m2) | 19 (43) | 23 (46) | 19 (45) | 13 (36) | 13 (35) | 12 (33) | 16 (44) |  |
| Overweight (25-29.9 kg/m2) | 8 (17) | 9 (18) | 12 (29) | 9 (18) | 10 (27) | 8 (23) | 8 (22) |  |
| Obese (≥ 30 kg/m2) | 13 (30) | 14 (28) | 3 (7) | 3 (8) | 4 (11) | 3 (8) | 3 (8) |  |
| LOW (%) mean (SE) | 3.3 (1.1) | 6.0 (0.7) | 9.1 (0.7) | 10.7 (0.8) | 9.8 (0.9) | 12.1 (1.1) | 13.0 (1.4) | 0.002* |
| *Weight loss categories n (%)* |  |  |  |  |  |  |  |  |
| < 5% | 33 (73) | 23 (46) | 6 (14) | 1 (3) | 7 (19) | 7 (21) | 5 (13) |  |
| 5-9.9% | 6 (13) | 16 (32) | 24 (57) | 18 (50) | 13 (35) | 6 (18) | 7 (20) |  |
| 10-14.9% | 4 (9) | 8 (16) | 9 (21) | 13 (37) | 11 (29) | 14 (38) | 13 (37) |  |
| 15-19.9% | 1 (2) | 2 (4) | 2 (6) | 0 (0) | 4 (10) | 2 (6) | 4 (10) |  |
| ≥ 20% | 1 (2) | 1 (2) | 1 (3) | 4 (10) | 2 (6) | 6 (18) | 7 (20) |  |

BMI: body mass index (kg/m2); LOW: loss of weight; SE: standard error

* p value indicates a significant overall time effect (Linear mixed model)
