# Supplementary material for: Longitudinal changes in skeletal muscle and adipose tissue during surgical treatment of oesophagogastric cancer: a prospective study.
Source: Research Square preprint supplement (doi:10.21203/rs.3.rs-4704469/v1), 2024-10-08
Supplement: Supplementary file 2 [file df929a14db14d1b46cf5338c.docx]

**Table 3**: The absolute values for anthropometric and CT body composition variables at diagnosis, preoperatively and 12 months postoperatively, comparing patients who were in obese (BMI ≤ 30kg/m2) and non-obese (BMI < 30kg/m2) groups before surgery. Linear mixed models assessed overall within-group (time effect) and between-group (obese vs non-obese) differences for 32 patients with CT body composition analysis at each time point. Post-hoc analyses compared differences at each time point.

|  | Diagnosis | | | Preoperative | | | Postoperative (12 months) | | | Overall group effect |
| --- | --- | --- | --- | --- | --- | --- | --- | --- | --- | --- |
|  | Non-obese  n = 24 | Obese  n = 8 | P value | Non-obese  n = 24 | Obese  n = 8 | P value | Non-obese  n = 24 | Obese  n = 8 | P value | P value |
| *Anthropometrics* |  |  |  |  |  |  |  |  |  |  |
| Weight (kg)# | 73.7 (2.8) | 118.2 (9.5) | < 0.001 | 72.7 (2.6) | 113.1 (9.3) | < 0.001 | 66.8 (2.9) | 92.2 (9.2) | 0.003 | < 0.001a,b |
| % LOW | 2.9 (0.9) | 0 (0) | 0.082 | 5.2 (1.2) | 5.1 (1.7) | 0.160 | 11.4 (1.3) | 18.4 (4.3) | 0.048 | 0.069 |
| *CT body composition* |  |  |  |  |  |  |  |  |  |  |
| Skeletal muscle (cm2)# | 135.3 (7.1) | 191.8 (18.1) | < 0.001 | 127.5 (6.8) | 178.1 (15.7) | 0.002 | 124.6 (7.0) | 160.5 (12.3) | 0.016 | 0.006a,b |
| Visceral AT (cm2)* | 116.2 (18.5) | 415.8 (56.6) | < 0.001 | 114.5 (18.0) | 380.7 (46.9) | < 0.001 | 63.6 (12.7) | 140.8 (32.2) | 0.011 | < 0.001b |
| Subcutaneous AT (cm2)* | 145.7 (8.9) | 302.8 (57.2) | < 0.001 | 138.5 (12.3) | 301.4 (59.3) | < 0.001 | 117.4 (12.5) | 179.0 (47.3) | 0.267 | < 0.001b |
| Total AT (cm2)* | 237.7 (22.2) | 808.8 (149.6) | < 0.001 | 264.2 (26.5) | 742.6 (135.4) | < 0.001 | 192.0 (24.0) | 315.0 (91.6) | 0.204 | < 0.001b |
| Muscle density (HU)# | 40.6 (1.6) | 27.1 (4.9) | < 0.001 | 38.7 (1.6) | 28.6 (3.9) | < 0.001 | 41.5 (1.6) | 36.0 (3.8) | 0.126 | 0.006b |
| Lean muscle mass (kg)# | 46.7 (2.1) | 63.6 (5.4) | < 0.001 | 44.3 (2.0) | 59.5 (4.7) | 0.002 | 43.4 (2.21) | 54.2 (3.7) | 0.016 | 0.006a,b |
| Fat mass (kg)* | 22.7 (0.9) | 45.2 (6.3) | < 0.001 | 22.3 (1.1) | 42.4 (5.7) | <0 .001 | 19.3 (1.0) | 24.4 (3.8) | 0.204 | < 0.001b |

AT: adipose tissue; HU: Hounsfield Units; LOW: loss of weight.

#mean (SE); *median (IQR);

a p < 0.05 within-group time effect difference between diagnosis and preoperative.

b p < 0.05 within-group time effect difference between preoperative and postoperative.
