# Supplementary material for: Longitudinal changes in skeletal muscle and adipose tissue during surgical treatment of oesophagogastric cancer: a prospective study.
Source: Research Square preprint supplement (doi:10.21203/rs.3.rs-4704469/v1), 2024-10-08
Supplement: Supplementary file 3 [file e46bb7c015a272b38c9cfb55.docx]

**Table 1.** Baseline characteristics and postoperative outcomes in oesophagogastric cancer surgery patients (n = 50).

| Age (years), mean (SD) | 64 (10) |  | Adjuvant therapy, n (%) |  |
| --- | --- | --- | --- | --- |
| Gender, n (%) |  |  | Chemotherapy | 11 (22) |
| Male | 31 (62) |  | No adjuvant therapy | 39 (78) |
| Female | 19 (38) |  | Resection type, n (%) |  |
| Comorbidities, n (%) |  |  | Distal gastrectomy | 1 (2) |
| History of smoking | 33 (66) |  | Subtotal gastrectomy | 5 (10) |
| Cardiac | 11 (22) |  | Total Gastrectomy | 3 (6) |
| Respiratory | 11 (22) |  | Total extended gastrectomy | 7 (14) |
| Diabetes | 8 (16) |  | 3 stage oesophagectomy | 7 (14) |
| Renal | 3 (6) |  | Ivor Lewis oesophagectomy - open | 3 (6) |
| Primary tumour site, n (%) |  |  | Ivor Lewis oesophagectomy - hybrid | 24 (48) |
| Gastric | 8 (16) |  | Feeding jejunostomy tube, n (%) | 14 (28) |
| Oesophageal | 12 (24) |  | Postoperative complications, n (%) |  |
| Oesophago-gastric junction | 30 (60) |  | Overall | 30 (60) |
| Disease pathology, n (%) |  |  | Anastomotic leak | 6 (12) |
| Adenocarcinoma | 39 (78) |  | Atelectasis | 0 (0) |
| Squamous cell carcinoma | 6 (12) |  | Bacteraemia | 5 (10) |
| Signet ring | 5 (10) |  | Cardiac arrythmia | 8 (16) |
| Neoadjuvant therapy, n (%) |  |  | Chyle leak | 2 (4) |
| Chemotherapy | 13 (26) |  | Pleural effusion | 6 (12) |
| Chemoradiation | 30 (60) |  | Pneumonia | 9 (18) |
| No neoadjuvant therapy | 7 (14) |  | Pneumothorax | 1 (2) |
| Pathological TNM stage, n (%) |  |  | Wound infection | 4 (8) |
| Stage 0 | 0 (0) |  | Severe complication | 13 (26) |
| Stage 1 | 9 (18) |  | Postoperative outcomes |  |
| Stage 2a | 5 (10) |  | LOS (days), median (IQR) | 11 (8-16) |
| Stage 2b | 7 (14) |  | Readmitted ≤ 90 days, n (%) | 9 (18) |
| Stage 3 | 21 (42) |  | Disease recurrence at 1 year, n (%) | 13 (26) |
| Stage 4a | 8 (16) |  | Overall survival at 1 year, n (%) | 40 (78) |
| Stage 4b | 0 (0) |  |  |  |

### LOS: length of stay; SD: standard deviation; TNM: tumour, node, metastasis.
